# Supplementary material
Source: PubMed Central journal article supplement (PMC3289274)

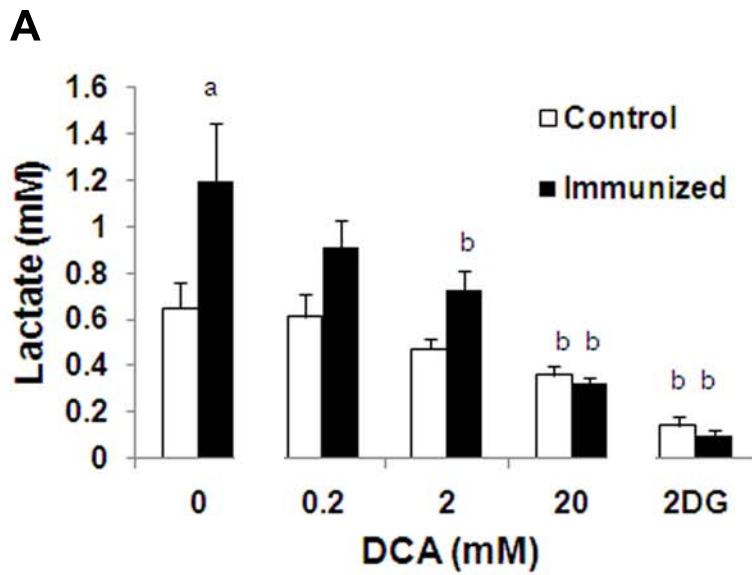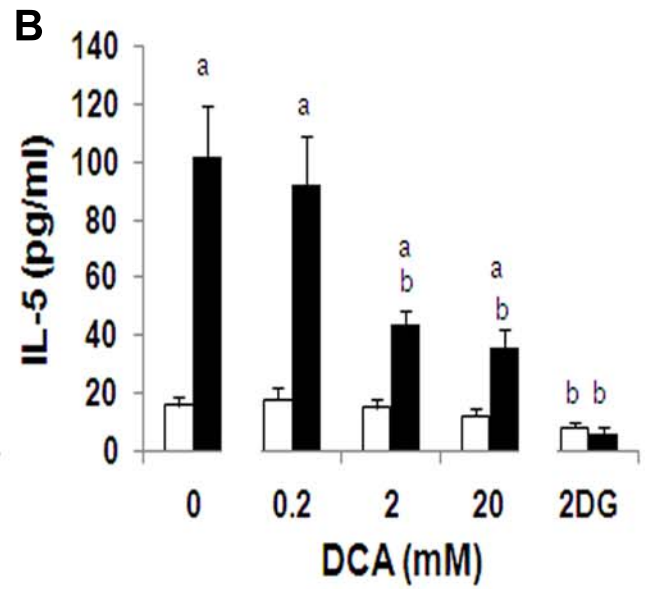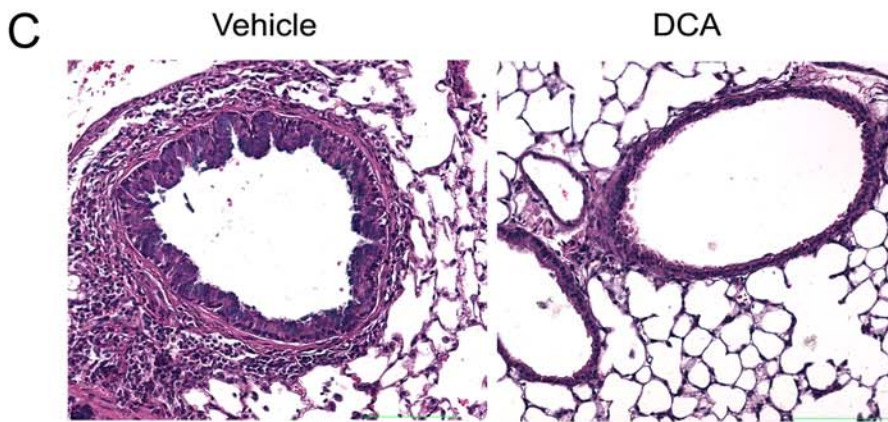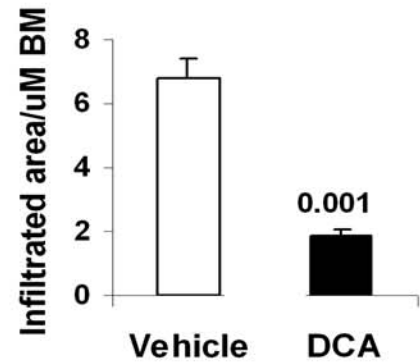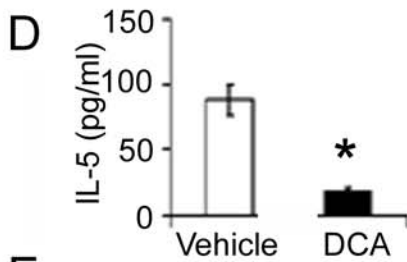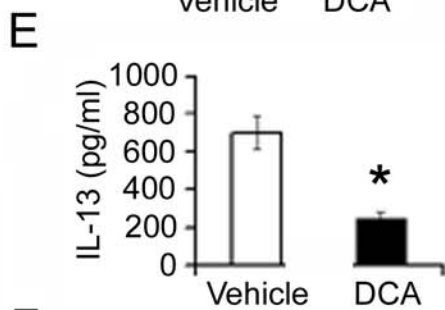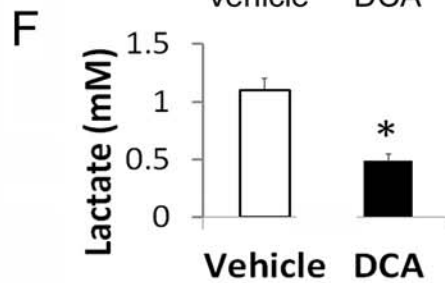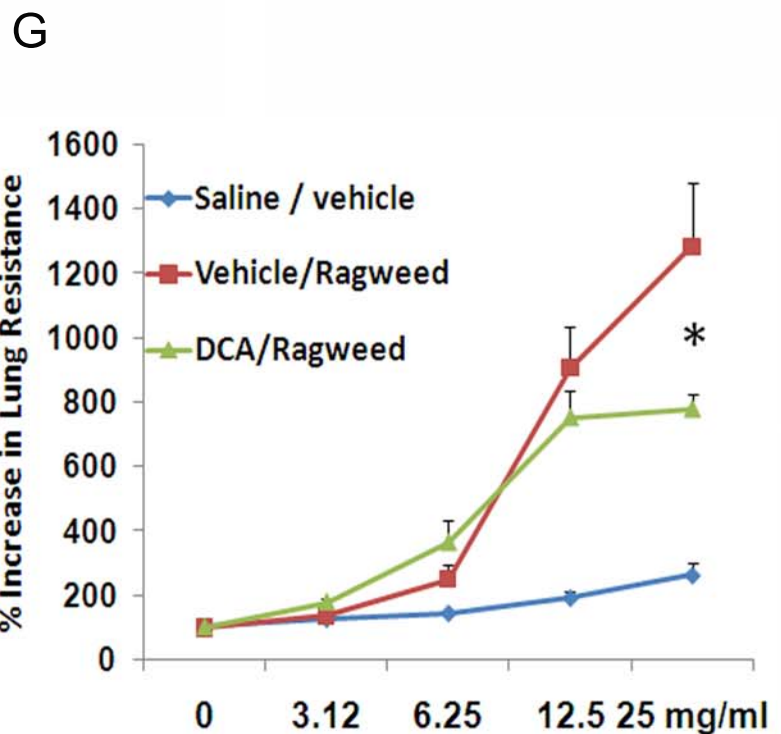

Supplement: supp_00221.2011_Figure_5_corrected.pdf [file supp_00221.2011_Figure_5_corrected.pdf]
